# Supplementary material
Source: PubMed Central journal article supplement (PMC4648705)

## Supplemental Material

### Supplemental Figure Legends

**Supplemental Figure 1: PVR is required for antiviral defense in *Drosophila*, related to Figure 1.** (A) Immunoblot quantification for phospho-ERK, total ERK, and tubulin provided for Figure 1B. Mean  $\pm$  SD; n=3; \*p<0.05. (B) Immunoblot quantification for PVR and tubulin provided for Figure 1C. Mean  $\pm$  SD; n=3; \*p<0.05. (C) Representative images of flies of the indicated genotypes fed PBS with red dye for 7 days. (D) RT-qPCR analysis of DENV RNA normalized to rp49 and shown relative to control (Myo1A>+) from the posterior half of midguts isolated from flies of the indicated genotype at 10 dpi. Mean  $\pm$  SD; n=3; \*p<0.05. (E-F) Representative images of the posterior midgut of Myo1A>+ (E) or Myo1A>PVR IR<sup>VDRC</sup> (F) challenged with the DCV (E) or SINV (F) at 7 dpi (10x, virus-green, nuclei-blue). (G) RT-qPCR analysis of viral RNA normalized to rp49 and shown relative to control (HS>+) from midguts isolated from flies of the indicated genotypes at 7 dpi. Mean  $\pm$  SD; n $\geq$ 3; \*p<0.05. (H) Immunoblot quantification for phospho-ERK and total ERK provided for Figure 1G. Mean  $\pm$  SD; n=3; \*p<0.05.

**Supplemental Figure 2: Pvf2 is required for antiviral defense in *Drosophila* and overexpression of Pvf2 is protective against enteric infections, related to Figure 2.** (A) RT-qPCR analysis of viral RNA normalized to rp49 and shown relative to control (w<sup>1118</sup>) from midguts isolated from flies of the indicated genotypes at 7 dpi. Mean  $\pm$  SD; n=3; \*p<0.05. (B) Immunoblot quantification for phospho-ERK, total ERK, and tubulin provided for Figure 2E, Mean  $\pm$  SD; n=3 (phospho-ERK, total ERK); n=2 (tubulin); \*p<0.05. (C) Representative immunoblot analysis of 20 pooled HS>+ or HS>Pvf2 intestines. (D) Immunoblot quantification for phospho-ERK and total ERK provided for Supplemental Figure 2C. Mean  $\pm$ SD; n=3; \*p<0.05. (E) Representative immunoblot of 20 pooled Myo1A>+ or Myo1A>Pvf2 intestines. (F) Immunoblot quantification for phospho-ERK and total ERK for Supplemental Figure 2E. Mean  $\pm$  SD; n=3; \*p<0.05. (G) RT-qPCR analysis of viral RNA normalized to rp49 and shown relative to control (Myo1A>+) from midguts isolated from flies of the indicated genotypes at 7 dpi. Mean  $\pm$  SD; n=4; \*p<0.05.

**Supplemental Figure 3: Validation of antibiotic-treated and germ-free flies, related to Figure 4.** (A) *Drosophila* cells were treated for 1h with the supernatant of the indicated bacterial species and dipterin expression was monitored by RT-qPCR for three independent experiments with mean  $\pm$  SD shown for n=3. (B, D) Representative images of bacterial plates from 5 pooled guts from antibiotic treated (B) or germ-free (D) and control animals. (C, E) Representative images of flies from antibiotic-treated (C) or germ-free (E) and controls fed PBS with red dye for 7 days. (F) Immunoblot quantification for phospho-ERK and total ERK provided for Figure 4D. Mean  $\pm$  SD; n=3; \*p<0.05.

**Supplemental Figure 4: NF-kB, not JNK, is required for antiviral defense, related to Figure 6.** (A) Representative images of midguts from sibling control or Rel mutant flies 7 dpi (40x; DCV-green, nuclei-blue). (B-D) RT-qPCR analysis of DCV RNA normalized to rp49 and shown relative to control from midguts isolated from flies of the indicated genotypes at 7 dpi. Mean  $\pm$  SD; n $\geq$ 3; \*p<0.05. (E) RT-qPCR analysis of DCV RNA normalized to rp49 and shown relative to control (Tak1 -/+ abx-) from midguts isolated

from of flies the indicated genotypes at 7 dpi. Mean  $\pm$  SD; n=4. (F) RT-qPCR analysis of Pvf2 RNA normalized to rp49 and shown relative to control (Myo1A>+) from midguts isolated from flies of the indicated genotypes at 4 hpi. Mean  $\pm$  SD; n=3; \*p<0.05.

**Supplemental Figure 5: Antiviral ERK activation requires a two-signal system, related to Figure 7.** (A) RT-qPCR analysis of viral RNA normalized to rp49 and shown relative to control (HS>+) from midguts isolated from flies of the indicated genotypes at 7 dpi. Mean  $\pm$  SD; n=3; \*p<0.05. (B) In posterior midgut enterocytes, Pvf2 induction requires two-signals to activate antiviral ERK signaling. Gram-negative commensals, such as *A. pomorum*, through recognition by PGRP-LC activate the Imd pathway, converging on NF- $\kappa$ B (Signal 1). However, NF- $\kappa$ B activation is not sufficient to induce Pvf2. A virus-dependent Cdk9-dependent signal is also required for Pvf2 induction (Signal 2). Both signals are necessary for antiviral ERK signaling in the intestine. It is unknown if Pvf2-PVR signaling is acting by an autocrine or paracrine mechanism to activate the antiviral ERK pathway.

**Supplemental Table 1: Drosophila stocks used, related to Experimental Procedures.**

**Supplemental Table 2: Primers used, related to Experimental Procedures.**

Table S1. *Drosophila* Stocks, related to Experimental Procedures

| Stock                               | Donor                                                                    | References                                                                                  |
|-------------------------------------|--------------------------------------------------------------------------|---------------------------------------------------------------------------------------------|
| Heat Shock-GAL4                     | Bloomington Stock Center (FBst0001799)                                   |                                                                                             |
| UAS-EGFR DN                         | Bloomington Stock Center (FBst0005364)                                   | (Buchon et al., 2010; Buff et al., 1998; Molnar and de Celis, 2013; Wahlstrom et al., 2006) |
| UAS-Pvf2 (Pvf2 <sup>d02444</sup> )  | Bloomington Stock Center (FBst0019631)                                   | (Cho et al., 2002; Choi et al., 2008; Munier et al., 2002)                                  |
| Pvf2 <sup>c06947</sup>              | Bloomington Stock Center (FBst0020361)                                   | (Cho et al., 2002; Choi et al., 2008; Munier et al., 2002; Wood et al., 2006)               |
| Pvf2-lacZ                           | M.A. Yoo (Pusan National University, Busan, South Korea) (FBtp0052107)   | (Bond and Foley, 2009; Choi et al., 2008)                                                   |
| Myo1A-GAL4                          | E. Baehrecke (University of Massachusetts Medical School, Worcester, MA) | (Jiang et al., 2009; Morgan et al., 1994; Xu et al., 2013)                                  |
| UAS-PVR IR <sup>8222R</sup> NIG     | B. Stronach (University of Pittsburgh, Pittsburgh, PA) (FBal0275906)     | (Brock et al., 2012; Ishimaru et al., 2004; Tran et al., 2013; Wu et al., 2009)             |
| UAS-PVR IR <sup>KK101575</sup> VDRC | B. Stronach (University of Pittsburgh, Pittsburgh, PA) (FBst0477180)     | (Tran et al., 2013)                                                                         |
| UAS-bsk DN                          | B. Stronach (University of Pittsburgh, Pittsburgh, PA) (FBst0006409)     | (Adachi-Yamada et al., 1999)                                                                |
| Rel <sup>E38</sup>                  | N. Silverman (University of Massachusetts Medical School,                | (Hedengren et al., 1999; Park et al., 2004; Takehana                                        |

|                                                |                                                                                        |                                                                     |
|------------------------------------------------|----------------------------------------------------------------------------------------|---------------------------------------------------------------------|
|                                                | Worcester, MA) (FBst0009458)                                                           | et al., 2002)                                                       |
| Tak1 <sup>2</sup>                              | N. Silverman (University of Massachusetts Medical School, Worcester, MA) (FBst0026272) | (Delaney et al., 2006; Stronach et al., 2014; Vidal et al., 2001)   |
| Imd <sup>1</sup>                               | N. Silverman (University of Massachusetts Medical School, Worcester, MA) (FBal0045906) | (Lemaitre et al., 1995; Lemaitre et al., 1996)                      |
| UAS-IMD                                        | N. Buchon (Cornell University, Ithaca, NY)( FBal0138219)                               | (Georgel et al., 2001)                                              |
| dMyD88 <sup>EP(2)2133</sup>                    | N. Silverman (University of Massachusetts Medical School, Worcester, MA) (FBal0130899) | (Nakamoto et al., 2012; Tauszig-Delamasure et al., 2002)            |
| Pvf1 <sup>EP1624</sup>                         | Bloomington Stock Center (FBst0011450)                                                 | (Duchek et al., 2001)                                               |
| PGRP-LC <sup>ΔE</sup>                          | N. Silverman (University of Massachusetts Medical School, Worcester, MA) (FBst0055713) | (Gottar et al., 2002; Kaneko et al., 2006; Leulier et al., 2003)    |
| PGRP-LE <sup>112</sup>                         | N. Silverman (University of Massachusetts Medical School, Worcester, MA) (FBst0033055) | (Aggarwal et al., 2008; Kaneko et al., 2006; Takehana et al., 2002) |
| PGRP-LE <sup>112</sup> ; PGRP-LC <sup>ΔE</sup> | N. Silverman (University of Massachusetts Medical School, Worcester, MA)               | (Aggarwal et al., 2008; Takehana et al., 2002)                      |
| UAS-Cdk9<br>IR <sup>KK101197</sup>             | Vienna Drosophila Resource Center (FBst0475419)                                        | (Xu et al., 2012)                                                   |

Table S2. Quantitative Real-Time PCR primers, related to Experimental Procedures

| Primer Name    | Sequence                        |
|----------------|---------------------------------|
| rp49 Forward   | AAG AAG CGC ACC AAG CAC TTC ATC |
| rp49 Reverse   | TCT GTT GTC GAT ACC CTT GGG CTT |
| DCV Forward    | TGG GAC AGG CAG TTA ATT CGT CCA |
| DCV Reverse    | AAG ACC GCA GTG TCT ACA CCA CAT |
| SINV Forward   | GCT GAA ACA CCA TCG CTC TGC TTT |
| SINV Reverse   | TGG TGT CGA AGC CAA TCC ACT ACA |
| VSV Forward    | CGG AGG ATT GAC GAC TAA TGC     |
| VSV Reverse    | ACC ATC CGA GCC ATT CGA         |
| DENV-2 Forward | TGA GGA CTA CAT GGG CTC TG      |
| DENV-2 Reverse | AAA CCT CCC TGG ATT TCC TT      |
| Pvf1 Forward   | TGG AGC AGG CCG AGA ACA AGT ATT |
| Pvf1 Reverse   | CCT GGA CAA TGA AGC GTT TGC GAT |
| Pvf2 Forward   | ACA ATT CTG CAC AGA TGC AGC GAC |
| Pvf2 Reverse   | CAT TGG AAC GGC CAT CCA CTT TGT |
| Pvf3 Forward   | TGC CTC GGT GGT CAT TAG GTT CTT |
| Pvf3 Reverse   | GCA GCA TCA CTT GCG TCA TCA CAA |
| dipt Forward   | GAC TGG CTT GTG CCT TC          |
| dipt Reverse   | CCT GAA GGT ATA CAC TCC         |

### **Supplemental Methods**

**Fly Rearing and Infections.** U0126 (500  $\mu$ M) was used as described (Bangi et al., 2011; Xu et al., 2013; Zhang et al., 2011).

To generate germ-free flies, eggs were washed in sterile deionized water, immersed in 50% sodium hypochlorite solution for 2 minutes, and rinsed three times in sterile water. For conventionally reared sibling controls, the eggs were immersed in sterile water as opposed to sodium hypochlorite (Ridley et al., 2012). Embryos were transferred to axenic standard fly food vials (2% yeast, 6.97% cornmeal, 9.6% sucrose, 1.5% agar) (Shin et al., 2011). Germ-free and conventional flies were aged to 7-10 days old and infected as above.

For antibiotic experiments, four to seven day old female flies were transferred onto vials containing 200  $\mu$ l of agarose- food (1.5% agarose, 7% corn syrup, 2% Bacto TC Yeastolate) supplemented with doxycycline (640  $\mu$ g/ml), ampicillin (640  $\mu$ g/ml), and kanamycin (1 mg/ml). Control flies were reared on agarose-food supplemented with vehicle. Three days later, flies were transferred to whatman paper containing 10  $\mu$ l of virus for one day and transferred onto fresh antibiotic- or vehicle-containing food every 3 days for the duration of the experiment.

Mono-associated flies were established by antibiotic treating and then transferring onto fly food amended with  $5 \times 10^8$  CFU of the indicated bacterial strains for 3 days. Oral infections were performed as described above. Commensals were heat killed by incubating at 80°C for 1 hour.

**Cell Culture.** Amplicons used are described at <http://flyrnai.org>. dsRNA were generated and used for RNAi for 3 days as previously described (Cherry et al., 2005). In brief, cells were passaged into serum-free media (SFM) and plated into wells containing dsRNA at 250 ng/16,500 cells in 384-well plates. After 1 hour in SFM, complete media was added and cells were incubated at 25°C for 3 days for gene knockdown and infected. VSV and DCV-infected cells were processed at 24 hours after infection and SINV-infected cells were processed at 36 hours after infection (Xu et al., 2013). Automated microscopy was performed using an ImageXpress Micro and image analysis was performed as previously described (Yasunaga et al., 2014).

**X-Gal Staining.** X-gal staining was performed as previously described (Choi et al., 2008). In brief, 5 guts per experiment were dissected in PBS and fixed in 1% glutaraldehyde for 10 minutes. Samples were washed 3 times in PBS and stained with 0.2% X-gal in staining buffer (6.1 mM  $K_4Fe(CN)_6$ , 6.1 mM  $K_3Fe(CN)_6$ , 1 mM  $MgCl_2$ , 150 mM NaCl, 10 mM  $Na_2HPO_4$ , 10 mM  $NaH_2PO_4$ ) in the dark at room temperature.

**Immunoblotting.** Immunoblot experiments probing for total ERK display only one band in *Drosophila* cell culture in contrast to two observed *in vivo* (Friedman and Perrimon, 2006; Xu et al., 2013).

**Chemicals and Reagents.** An antibody against DENV E protein (4G2) was provided by Michael Diamond (Washington University in St. Louis) and an antibody against PVR was provided by Katja Bruckner (University of California, San Francisco) (Sopko et al., 2015). Total Erk antibody (#9102) and phospho-Erk antibody (#4370) were obtained from Cell Signaling. Anti-DCV capsid antibody was used as described (Cherry and Perrimon,

2004). Additional chemicals and anti-tubulin antibody (T6199) were from Sigma. Commensals were grown in MRS broth in a shaking incubator at 29°C (Newell and Douglas, 2014) and *E. coli* was grown in LB broth in a shaking incubator at 37°C.

**Analysis of Intestinal Integrity.** Dye-feeding assays to assess intestinal barrier function were performed as previously described (Rera et al., 2011). Briefly, flies were fed food supplemented with red food dye (2.5%; FD&C red dye #40) for 7 days and monitored daily.

**Bacterial Plating.** Five guts per sample were dissected under sterile conditions in PBS and crushed. Serial dilutions were plated on MRS agar plates and incubated at 29°C. Three independent experiments were performed.

### **Supplemental References**

- Adachi-Yamada, T., Nakamura, M., Irie, K., Tomoyasu, Y., Sano, Y., Mori, E., Goto, S., Ueno, N., Nishida, Y., and Matsumoto, K. (1999). p38 mitogen-activated protein kinase can be involved in transforming growth factor beta superfamily signal transduction in *Drosophila* wing morphogenesis. *Molecular and cellular biology* 19, 2322-2329.
- Aggarwal, K., Rus, F., Vriesema-Magnuson, C., Erturk-Hasdemir, D., Paquette, N., and Silverman, N. (2008). Rudra interrupts receptor signaling complexes to negatively regulate the IMD pathway. *PLoS pathogens* 4, e1000120.
- Bangi, E., Garza, D., and Hild, M. (2011). In vivo analysis of compound activity and mechanism of action using epistasis in *Drosophila*. *Journal of chemical biology* 4, 55-68.
- Bond, D., and Foley, E. (2009). A quantitative RNAi screen for JNK modifiers identifies Pvr as a novel regulator of *Drosophila* immune signaling. *PLoS pathogens* 5, e1000655.
- Brock, A.R., Wang, Y., Berger, S., Renkawitz-Pohl, R., Han, V.C., Wu, Y., and Gallo, M.J. (2012). Transcriptional regulation of Profilin during wound closure in *Drosophila* larvae. *Journal of cell science* 125, 5667-5676.
- Buchon, N., Broderick, N.A., Kuraishi, T., and Lemaitre, B. (2010). *Drosophila* EGFR pathway coordinates stem cell proliferation and gut remodeling following infection. *BMC biology* 8, 152.
- Buff, E., Carmena, A., Gisselbrecht, S., Jimenez, F., and Michelson, A.M. (1998). Signalling by the *Drosophila* epidermal growth factor receptor is required for the specification and diversification of embryonic muscle progenitors. *Development (Cambridge, England)* 125, 2075-2086.
- Cherry, S., Doukas, T., Armknecht, S., Whelan, S., Wang, H., Sarnow, P., and Perrimon, N. (2005). Genome-wide RNAi screen reveals a specific sensitivity of IRES-containing RNA viruses to host translation inhibition. *Genes & development* 19, 445-452.
- Cherry, S., and Perrimon, N. (2004). Entry is a rate-limiting step for viral infection in a *Drosophila melanogaster* model of pathogenesis. *Nature immunology* 5, 81-87.
- Cho, N.K., Keyes, L., Johnson, E., Heller, J., Ryner, L., Karim, F., and Krasnow, M.A. (2002). Developmental control of blood cell migration by the *Drosophila* VEGF pathway. *Cell* 108, 865-876.
- Choi, N.H., Kim, J.G., Yang, D.J., Kim, Y.S., and Yoo, M.A. (2008). Age-related changes in *Drosophila* midgut are associated with PVF2, a PDGF/VEGF-like growth factor. *Aging cell* 7, 318-334.
- Delaney, J.R., Stoven, S., Uvell, H., Anderson, K.V., Engstrom, Y., and Mlodzik, M. (2006). Cooperative control of *Drosophila* immune responses by the JNK and NF-kappaB signaling pathways. *Embo J* 25, 3068-3077.

Duchek, P., Somogyi, K., Jekely, G., Beccari, S., and Rorth, P. (2001). Guidance of cell migration by the *Drosophila* PDGF/VEGF receptor. *Cell* 107, 17-26.

Friedman, A., and Perrimon, N. (2006). A functional RNAi screen for regulators of receptor tyrosine kinase and ERK signalling. *Nature* 444, 230-234.

Georgel, P., Naitza, S., Kappler, C., Ferrandon, D., Zachary, D., Swimmer, C., Kopczynski, C., Duyk, G., Reichhart, J.M., and Hoffmann, J.A. (2001). *Drosophila* immune deficiency (IMD) is a death domain protein that activates antibacterial defense and can promote apoptosis. *Developmental cell* 1, 503-514.

Gottar, M., Gobert, V., Michel, T., Belvin, M., Duyk, G., Hoffmann, J.A., Ferrandon, D., and Royet, J. (2002). The *Drosophila* immune response against Gram-negative bacteria is mediated by a peptidoglycan recognition protein. *Nature* 416, 640-644.

Hedengren, M., Asling, B., Dushay, M.S., Ando, I., Ekengren, S., Wihlborg, M., and Hultmark, D. (1999). Relish, a central factor in the control of humoral but not cellular immunity in *Drosophila*. *Molecular cell* 4, 827-837.

Ishimaru, S., Ueda, R., Hinohara, Y., Ohtani, M., and Hanafusa, H. (2004). PVR plays a critical role via JNK activation in thorax closure during *Drosophila* metamorphosis. *Embo J* 23, 3984-3994.

Jiang, H., Patel, P.H., Kohlmaier, A., Grenley, M.O., McEwen, D.G., and Edgar, B.A. (2009). Cytokine/Jak/Stat signaling mediates regeneration and homeostasis in the *Drosophila* midgut. *Cell* 137, 1343-1355.

Kaneko, T., Yano, T., Aggarwal, K., Lim, J.H., Ueda, K., Oshima, Y., Peach, C., Erturk-Hasdemir, D., Goldman, W.E., Oh, B.H., *et al.* (2006). PGRP-LC and PGRP-LE have essential yet distinct functions in the *drosophila* immune response to monomeric DAP-type peptidoglycan. *Nature immunology* 7, 715-723.

Lemaitre, B., Kromer-Metzger, E., Michaut, L., Nicolas, E., Meister, M., Georgel, P., Reichhart, J.M., and Hoffmann, J.A. (1995). A recessive mutation, immune deficiency (*imd*), defines two distinct control pathways in the *Drosophila* host defense. *Proceedings of the National Academy of Sciences of the United States of America* 92, 9465-9469.

Lemaitre, B., Nicolas, E., Michaut, L., Reichhart, J.M., and Hoffmann, J.A. (1996). The dorsoventral regulatory gene cassette *spatzle/Toll/cactus* controls the potent antifungal response in *Drosophila* adults. *Cell* 86, 973-983.

Leulier, F., Parquet, C., Pili-Floury, S., Ryu, J.H., Caroff, M., Lee, W.J., Mengin-Lecreux, D., and Lemaitre, B. (2003). The *Drosophila* immune system detects bacteria through specific peptidoglycan recognition. *Nature immunology* 4, 478-484.

Molnar, C., and de Celis, J.F. (2013). Tay bridge is a negative regulator of EGFR signalling and interacts with Erk and Mkp3 in the *Drosophila melanogaster* wing. *PLoS genetics* 9, e1003982.

Morgan, N.S., Skovronsky, D.M., Artavanis-Tsakonas, S., and Mooseker, M.S. (1994). The molecular cloning and characterization of *Drosophila melanogaster* myosin-IA and myosin-IB. *Journal of molecular biology* 239, 347-356.

Munier, A.I., Doucet, D., Perrodou, E., Zachary, D., Meister, M., Hoffmann, J.A., Janeway, C.A., Jr., and Lagueux, M. (2002). PVF2, a PDGF/VEGF-like growth factor, induces hemocyte proliferation in *Drosophila* larvae. *EMBO reports* 3, 1195-1200.

Nakamoto, M., Moy, R.H., Xu, J., Bambina, S., Yasunaga, A., Shelly, S.S., Gold, B., and Cherry, S. (2012). Virus recognition by Toll-7 activates antiviral autophagy in *Drosophila*. *Immunity* 36, 658-667.

Newell, P.D., and Douglas, A.E. (2014). Interspecies interactions determine the impact of the gut microbiota on nutrient allocation in *Drosophila melanogaster*. *Applied and environmental microbiology* 80, 788-796.

Park, J.M., Brady, H., Ruocco, M.G., Sun, H., Williams, D., Lee, S.J., Kato, T., Jr., Richards, N., Chan, K., Mercurio, F., *et al.* (2004). Targeting of TAK1 by the NF-kappa B

protein Relish regulates the JNK-mediated immune response in *Drosophila*. *Genes & development* *18*, 584-594.

Rera, M., Bahadorani, S., Cho, J., Koehler, C.L., Ulgherait, M., Hur, J.H., Ansari, W.S., Lo, T., Jr., Jones, D.L., and Walker, D.W. (2011). Modulation of longevity and tissue homeostasis by the *Drosophila* PGC-1 homolog. *Cell metabolism* *14*, 623-634.

Ridley, E.V., Wong, A.C., Westmiller, S., and Douglas, A.E. (2012). Impact of the resident microbiota on the nutritional phenotype of *Drosophila melanogaster*. *PloS one* *7*, e36765.

Shin, S.C., Kim, S.H., You, H., Kim, B., Kim, A.C., Lee, K.A., Yoon, J.H., Ryu, J.H., and Lee, W.J. (2011). *Drosophila* microbiome modulates host developmental and metabolic homeostasis via insulin signaling. *Science (New York, NY)* *334*, 670-674.

Sopko, R., Lin, Y.B., Makhijani, K., Alexander, B., Perrimon, N., and Bruckner, K. (2015). A systems-level interrogation identifies regulators of *Drosophila* blood cell number and survival. *PLoS genetics* *11*, e1005056.

Stronach, B., Lennox, A.L., and Garlena, R.A. (2014). Domain specificity of MAP3K family members, MLK and Tak1, for JNK signaling in *Drosophila*. *Genetics* *197*, 497-513.

Takehana, A., Katsuyama, T., Yano, T., Oshima, Y., Takada, H., Aigaki, T., and Kurata, S. (2002). Overexpression of a pattern-recognition receptor, peptidoglycan-recognition protein-LE, activates imd/relish-mediated antibacterial defense and the prophenoloxidase cascade in *Drosophila* larvae. *Proceedings of the National Academy of Sciences of the United States of America* *99*, 13705-13710.

Tauszig-Delamasure, S., Bilak, H., Capovilla, M., Hoffmann, J.A., and Imler, J.L. (2002). *Drosophila* MyD88 is required for the response to fungal and Gram-positive bacterial infections. *Nature immunology* *3*, 91-97.

Tran, T.A., Kinch, L., Pena-Llopis, S., Kockel, L., Grishin, N., Jiang, H., and Brugarolas, J. (2013). Platelet-derived growth factor/vascular endothelial growth factor receptor inactivation by sunitinib results in Tsc1/Tsc2-dependent inhibition of TORC1. *Molecular and cellular biology* *33*, 3762-3779.

Vidal, S., Khush, R.S., Leulier, F., Tzou, P., Nakamura, M., and Lemaitre, B. (2001). Mutations in the *Drosophila* dTAK1 gene reveal a conserved function for MAPKKKs in the control of rel/NF-kappaB-dependent innate immune responses. *Genes & development* *15*, 1900-1912.

Wahlstrom, G., Norokorpi, H.L., and Heino, T.I. (2006). *Drosophila* alpha-actinin in ovarian follicle cells is regulated by EGFR and Dpp signalling and required for cytoskeletal remodelling. *Mechanisms of development* *123*, 801-818.

Wood, W., Faria, C., and Jacinto, A. (2006). Distinct mechanisms regulate hemocyte chemotaxis during development and wound healing in *Drosophila melanogaster*. *The Journal of cell biology* *173*, 405-416.

Wu, Y., Brock, A.R., Wang, Y., Fujitani, K., Ueda, R., and Galko, M.J. (2009). A blood-borne PDGF/VEGF-like ligand initiates wound-induced epidermal cell migration in *Drosophila* larvae. *Current biology : CB* *19*, 1473-1477.

Xu, J., Grant, G., Sabin, L.R., Gordesky-Gold, B., Yasunaga, A., Tudor, M., and Cherry, S. (2012). Transcriptional pausing controls a rapid antiviral innate immune response in *Drosophila*. *Cell host & microbe* *12*, 531-543.

Xu, J., Hopkins, K., Sabin, L., Yasunaga, A., Subramanian, H., Lamborn, I., Gordesky-Gold, B., and Cherry, S. (2013). ERK signaling couples nutrient status to antiviral defense in the insect gut. *Proceedings of the National Academy of Sciences of the United States of America* *110*, 15025-15030.

Yasunaga, A., Hanna, S.L., Li, J., Cho, H., Rose, P.P., Spiridigliozzi, A., Gold, B., Diamond, M.S., and Cherry, S. (2014). Genome-wide RNAi screen identifies broadly-acting host factors that inhibit arbovirus infection. *PLoS pathogens* 10, e1003914.

Zhang, W., Thompson, B.J., Hietakangas, V., and Cohen, S.M. (2011). MAPK/ERK signaling regulates insulin sensitivity to control glucose metabolism in *Drosophila*. *PLoS genetics* 7, e1002429.



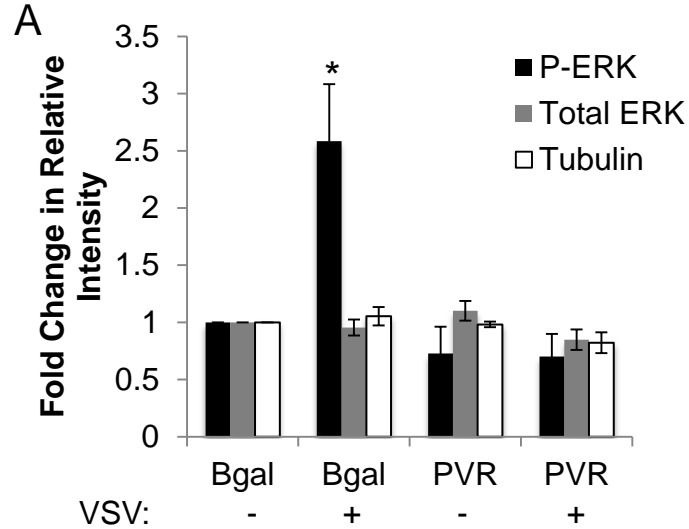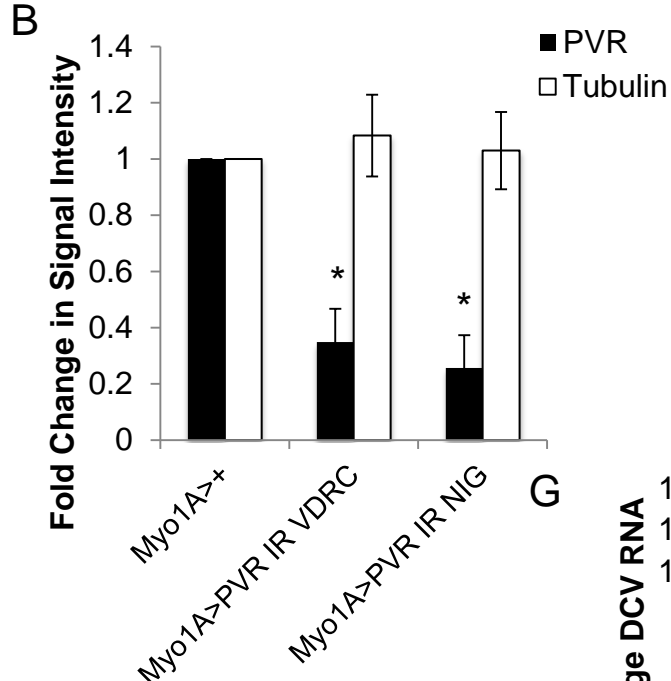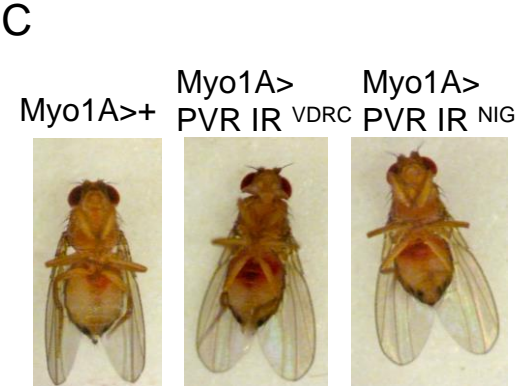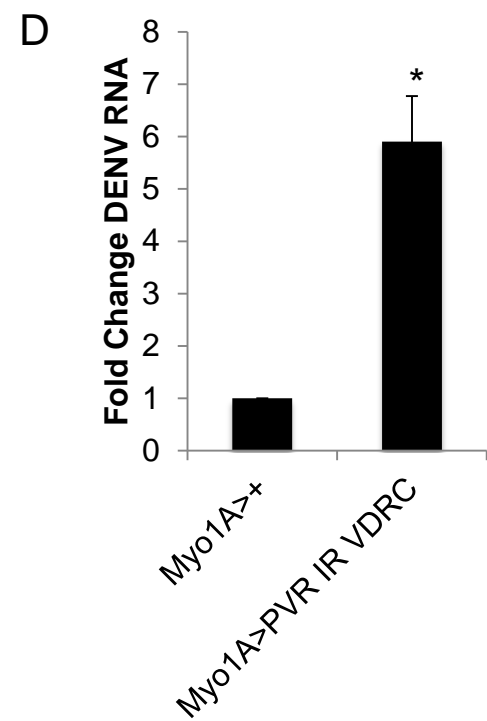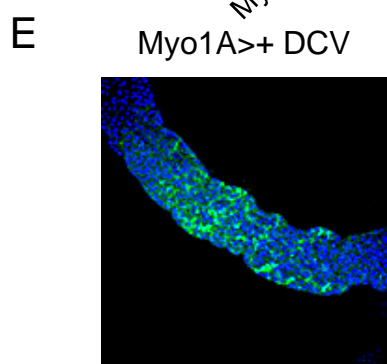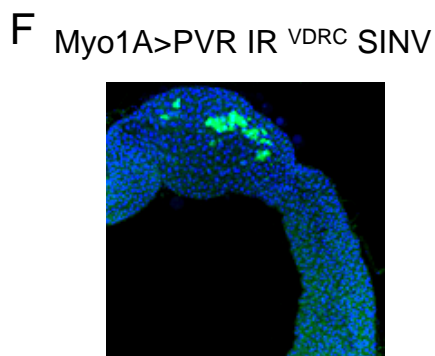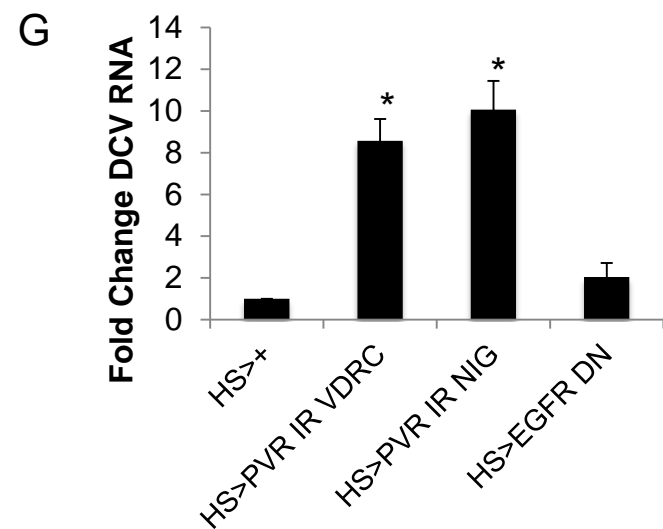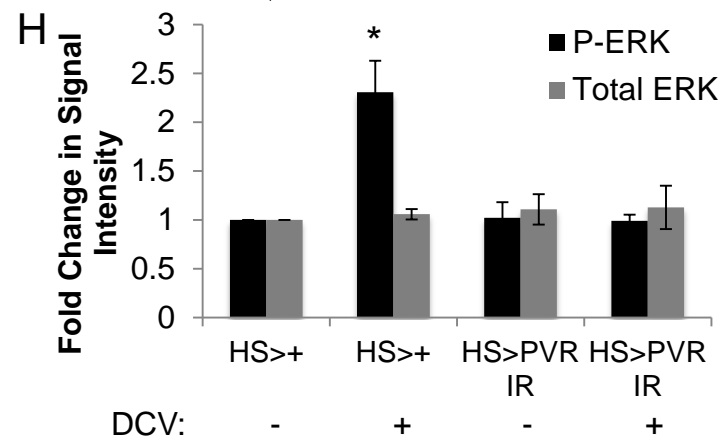

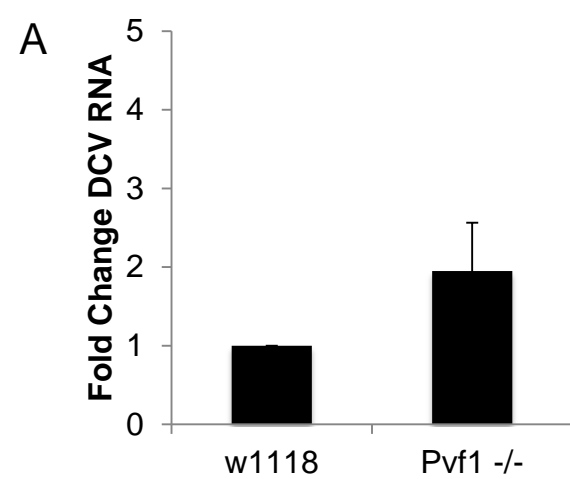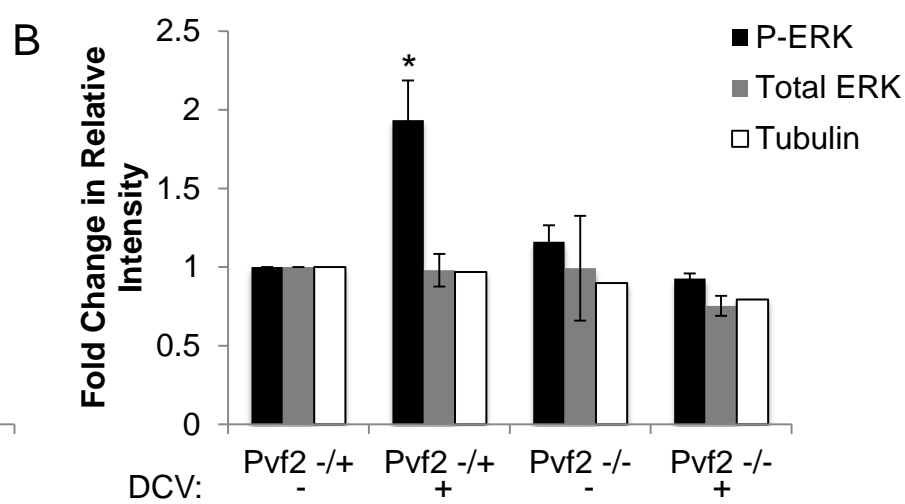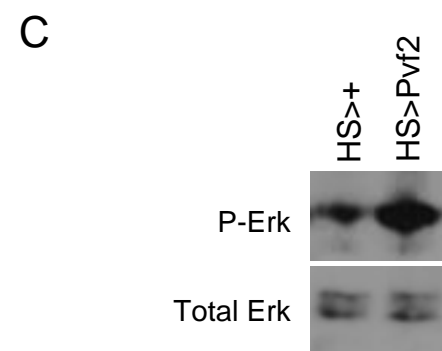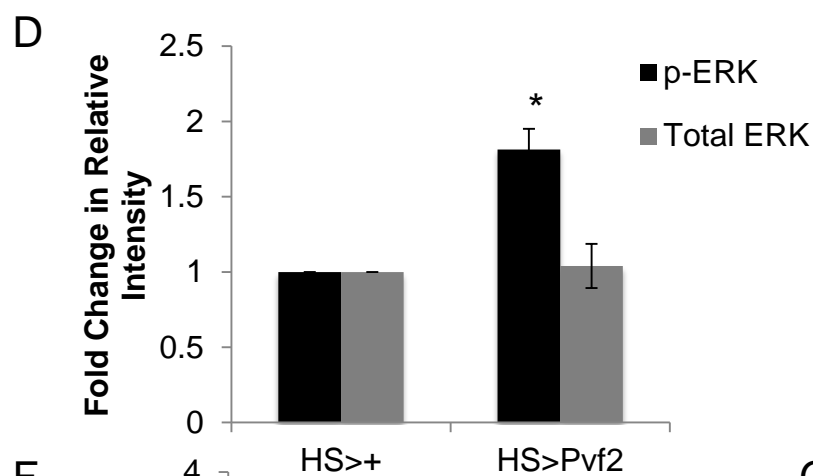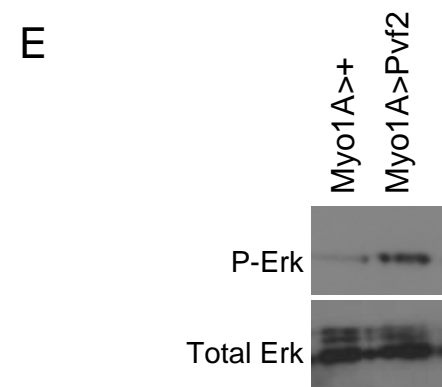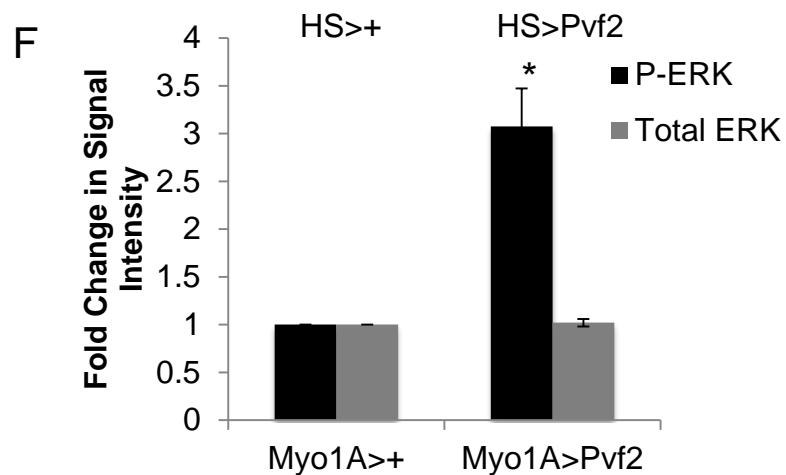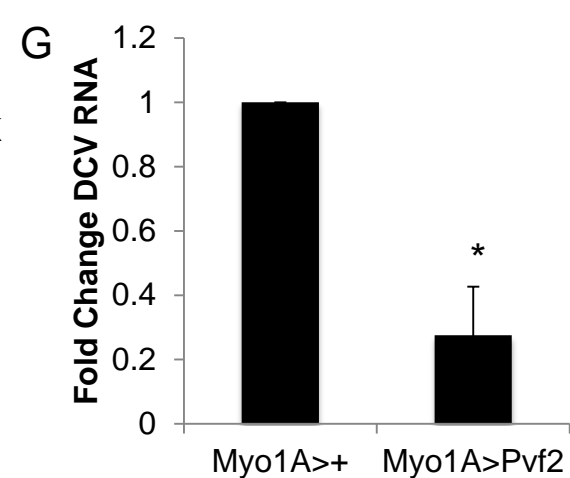

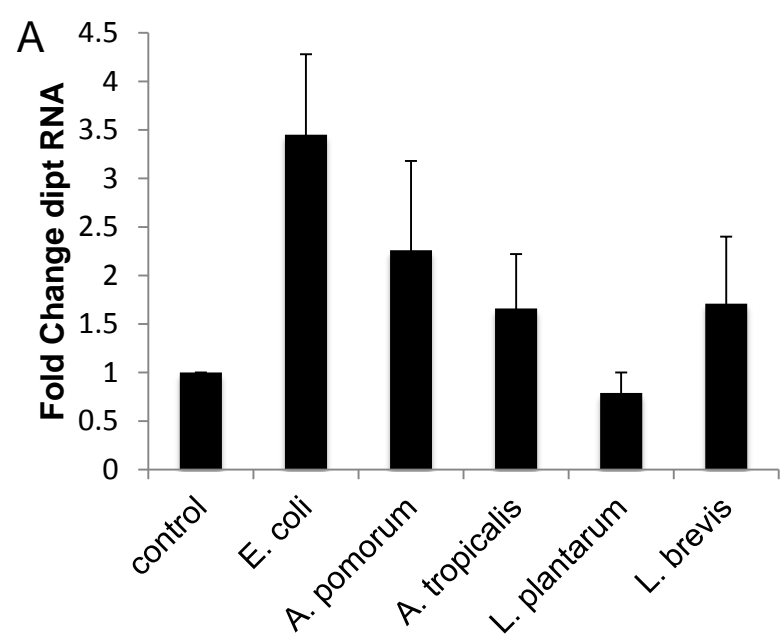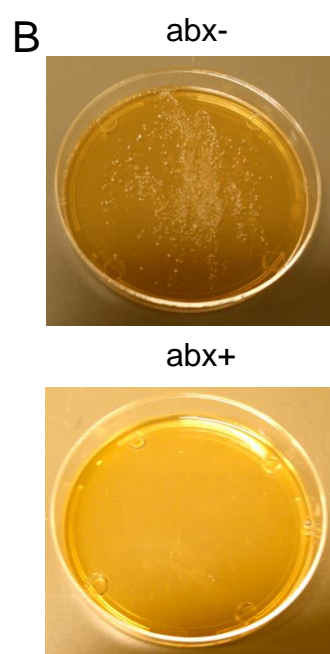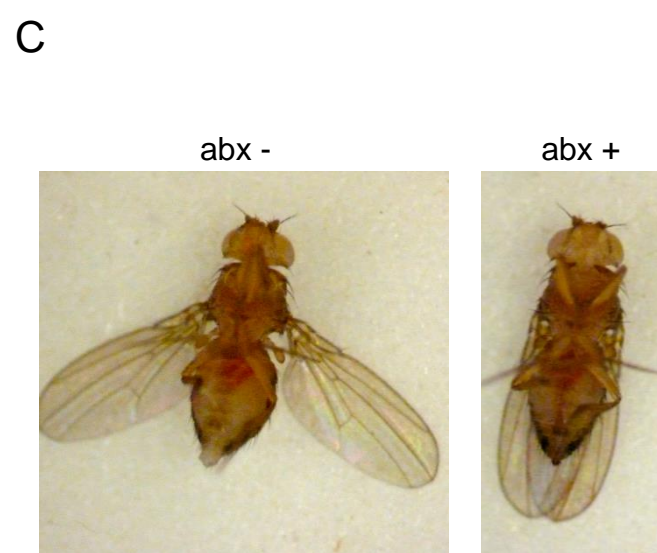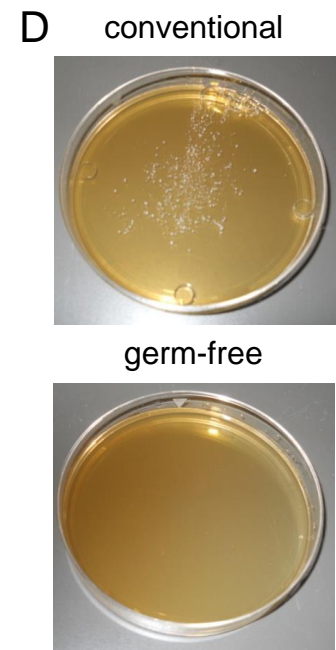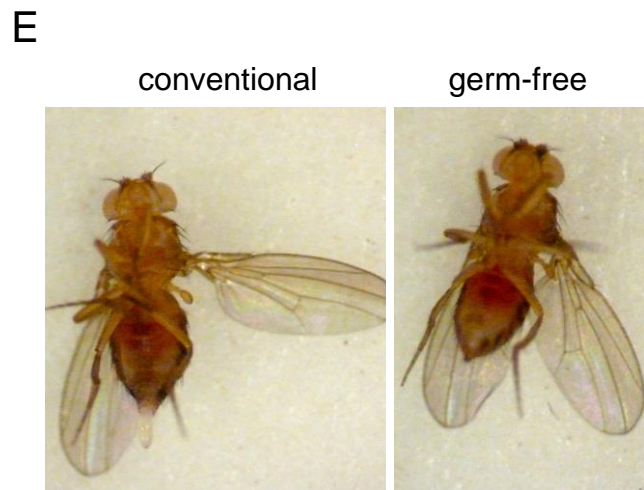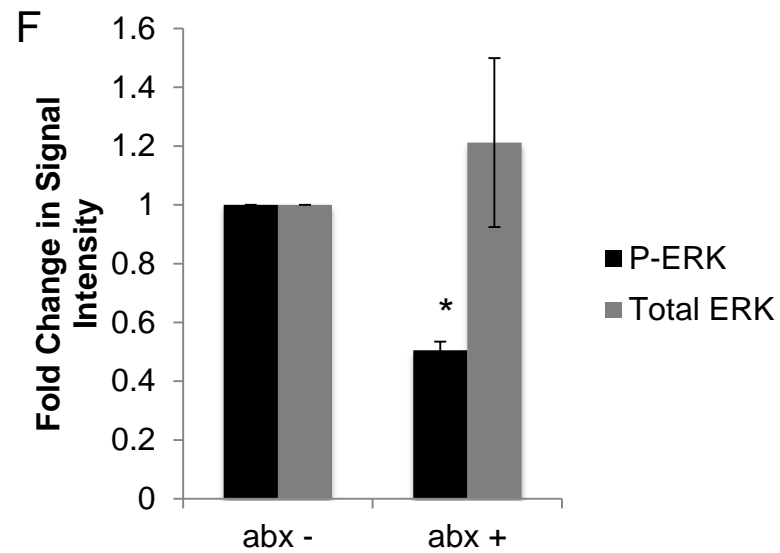

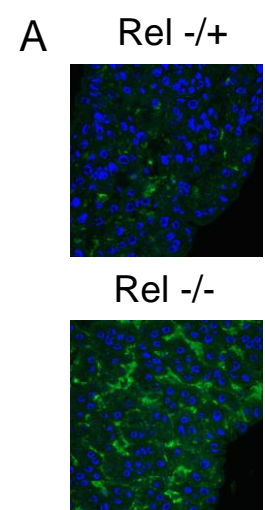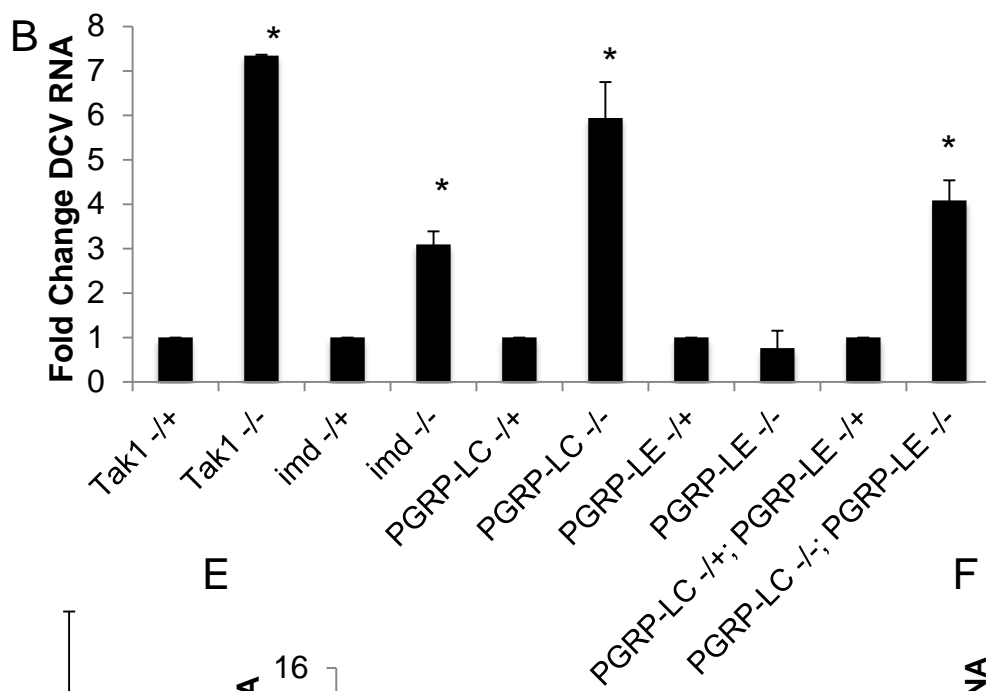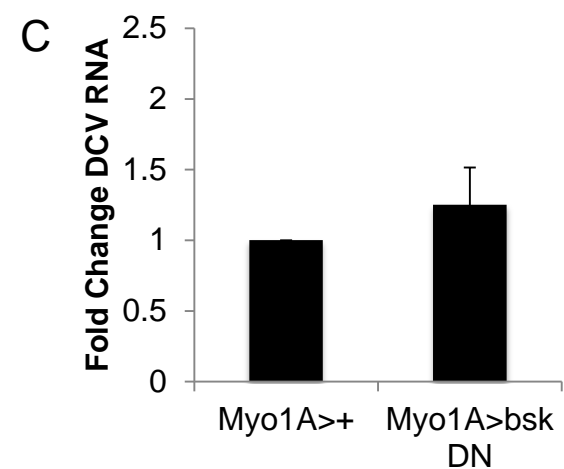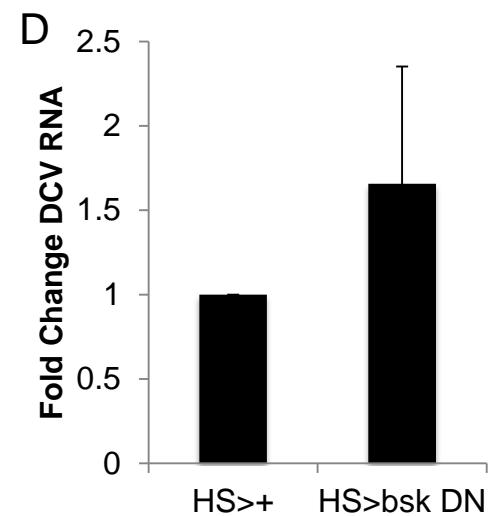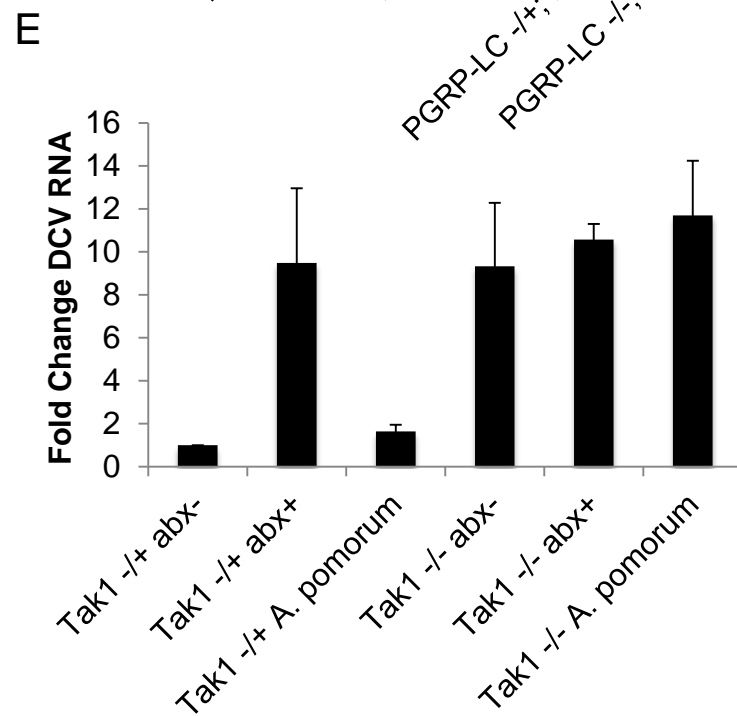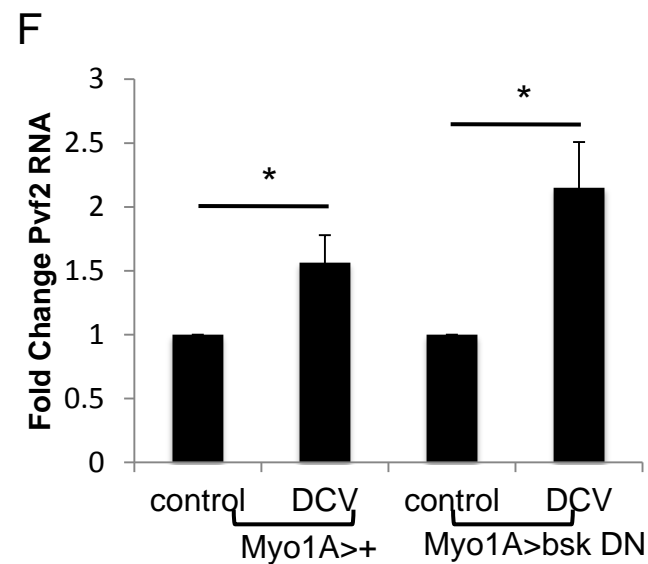

**B** SIGNAL 1

SIGNAL 2

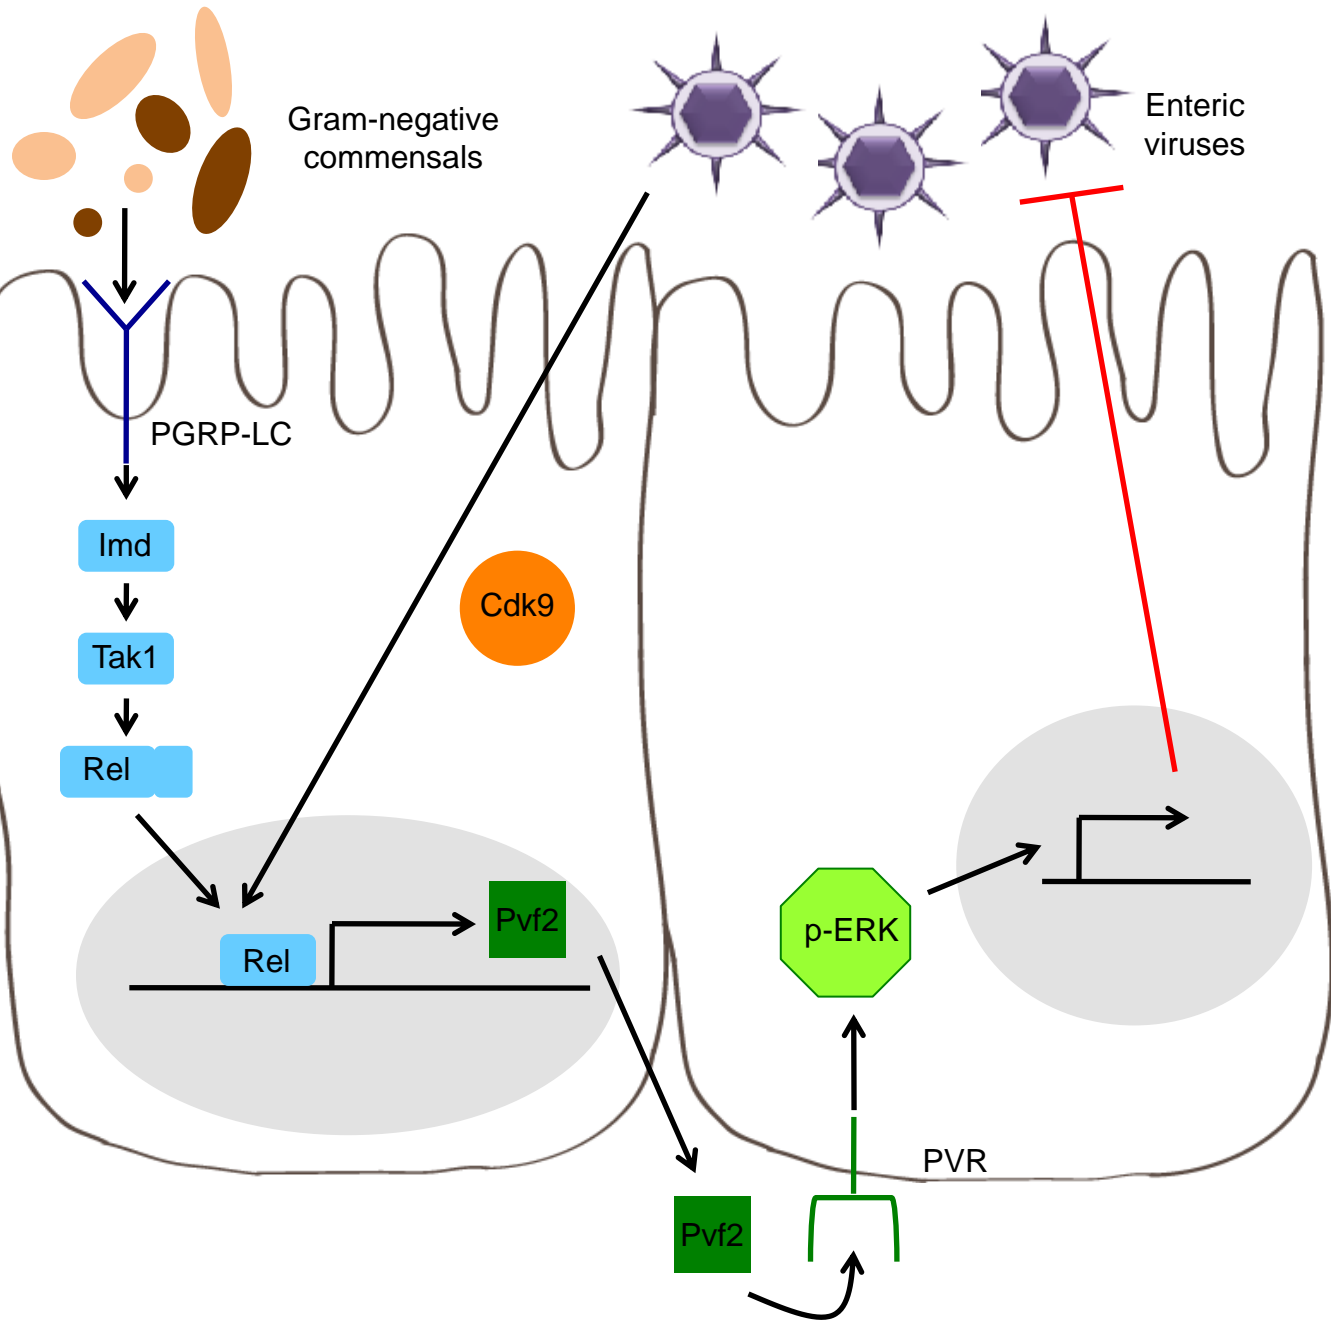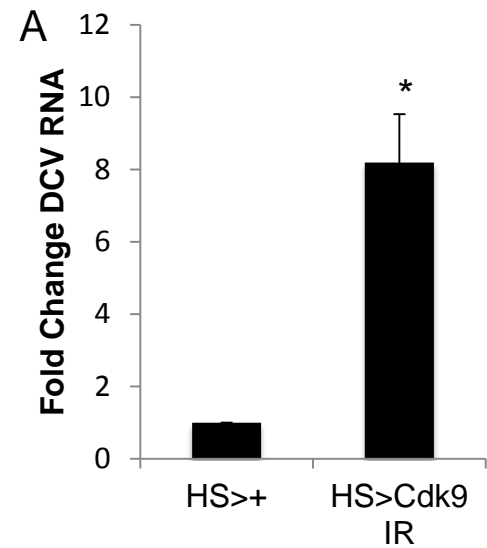

Supplement: NIHMS732228-supplement-1.pdf [file NIHMS732228-supplement-1.pdf]
