# Supplementary material
Source: PubMed Central journal article supplement (PMC4648705)

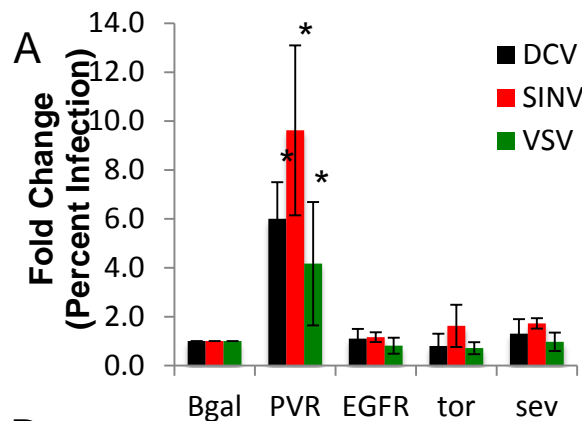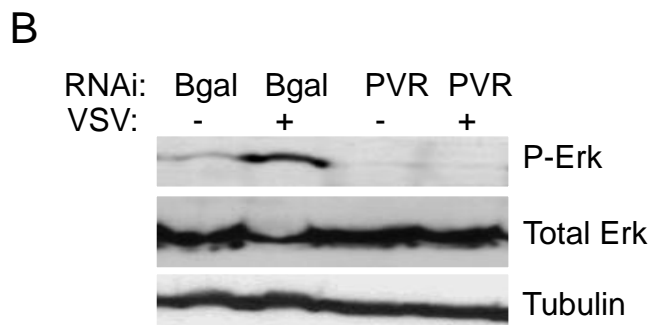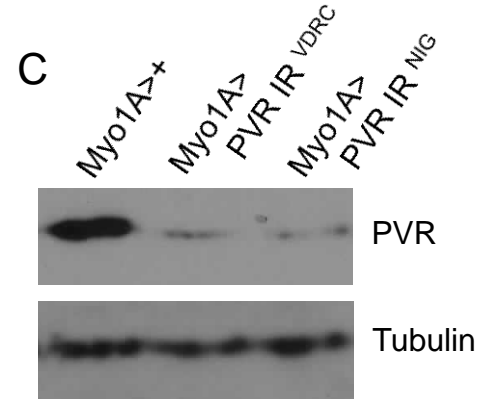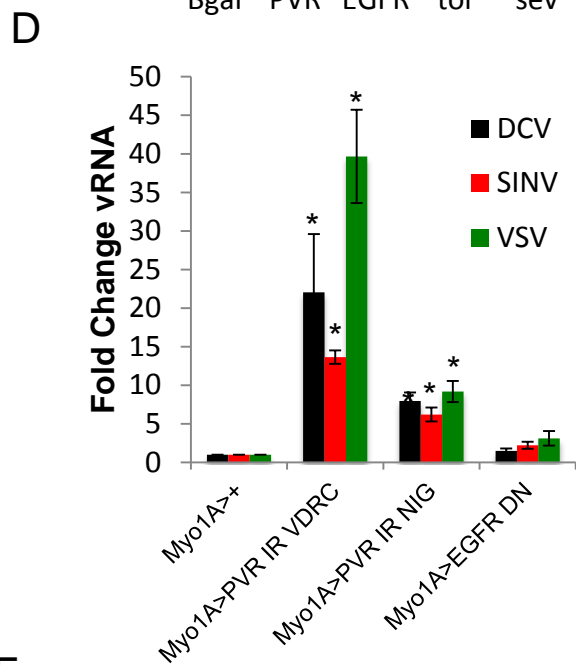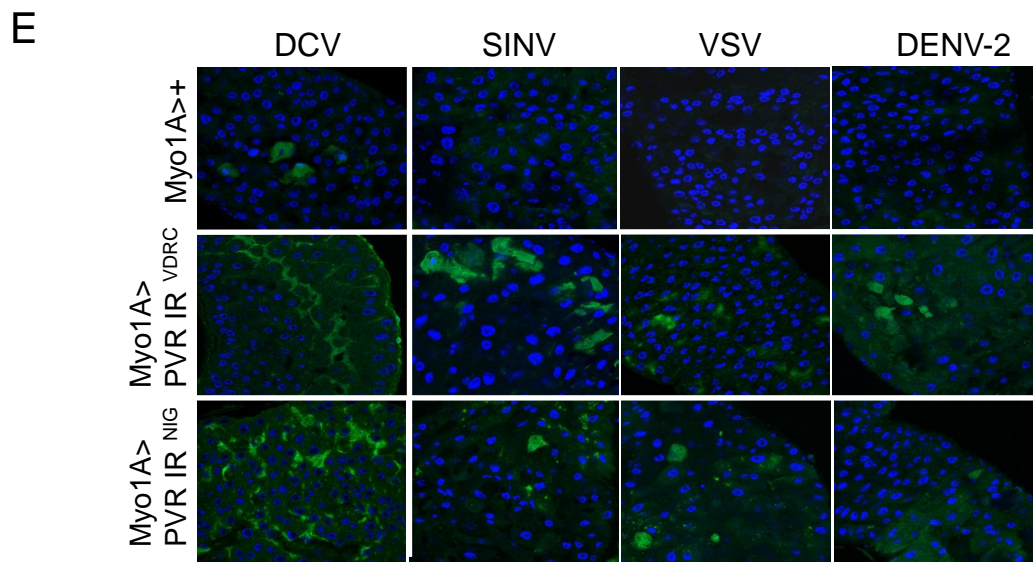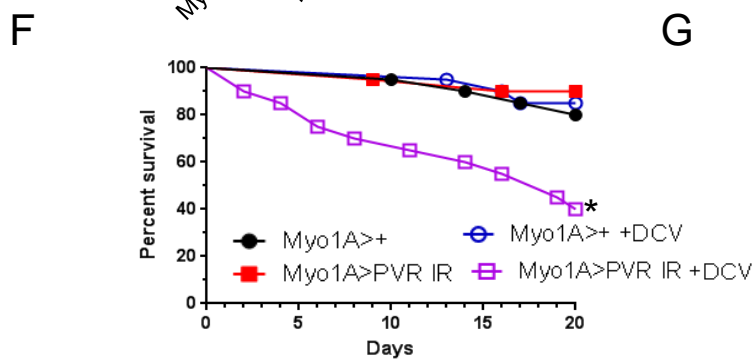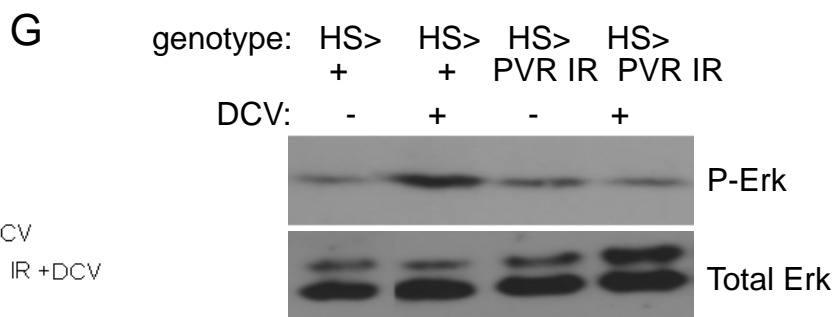

Supplement: NIHMS732228-supplement-2.pdf [file NIHMS732228-supplement-2.pdf]

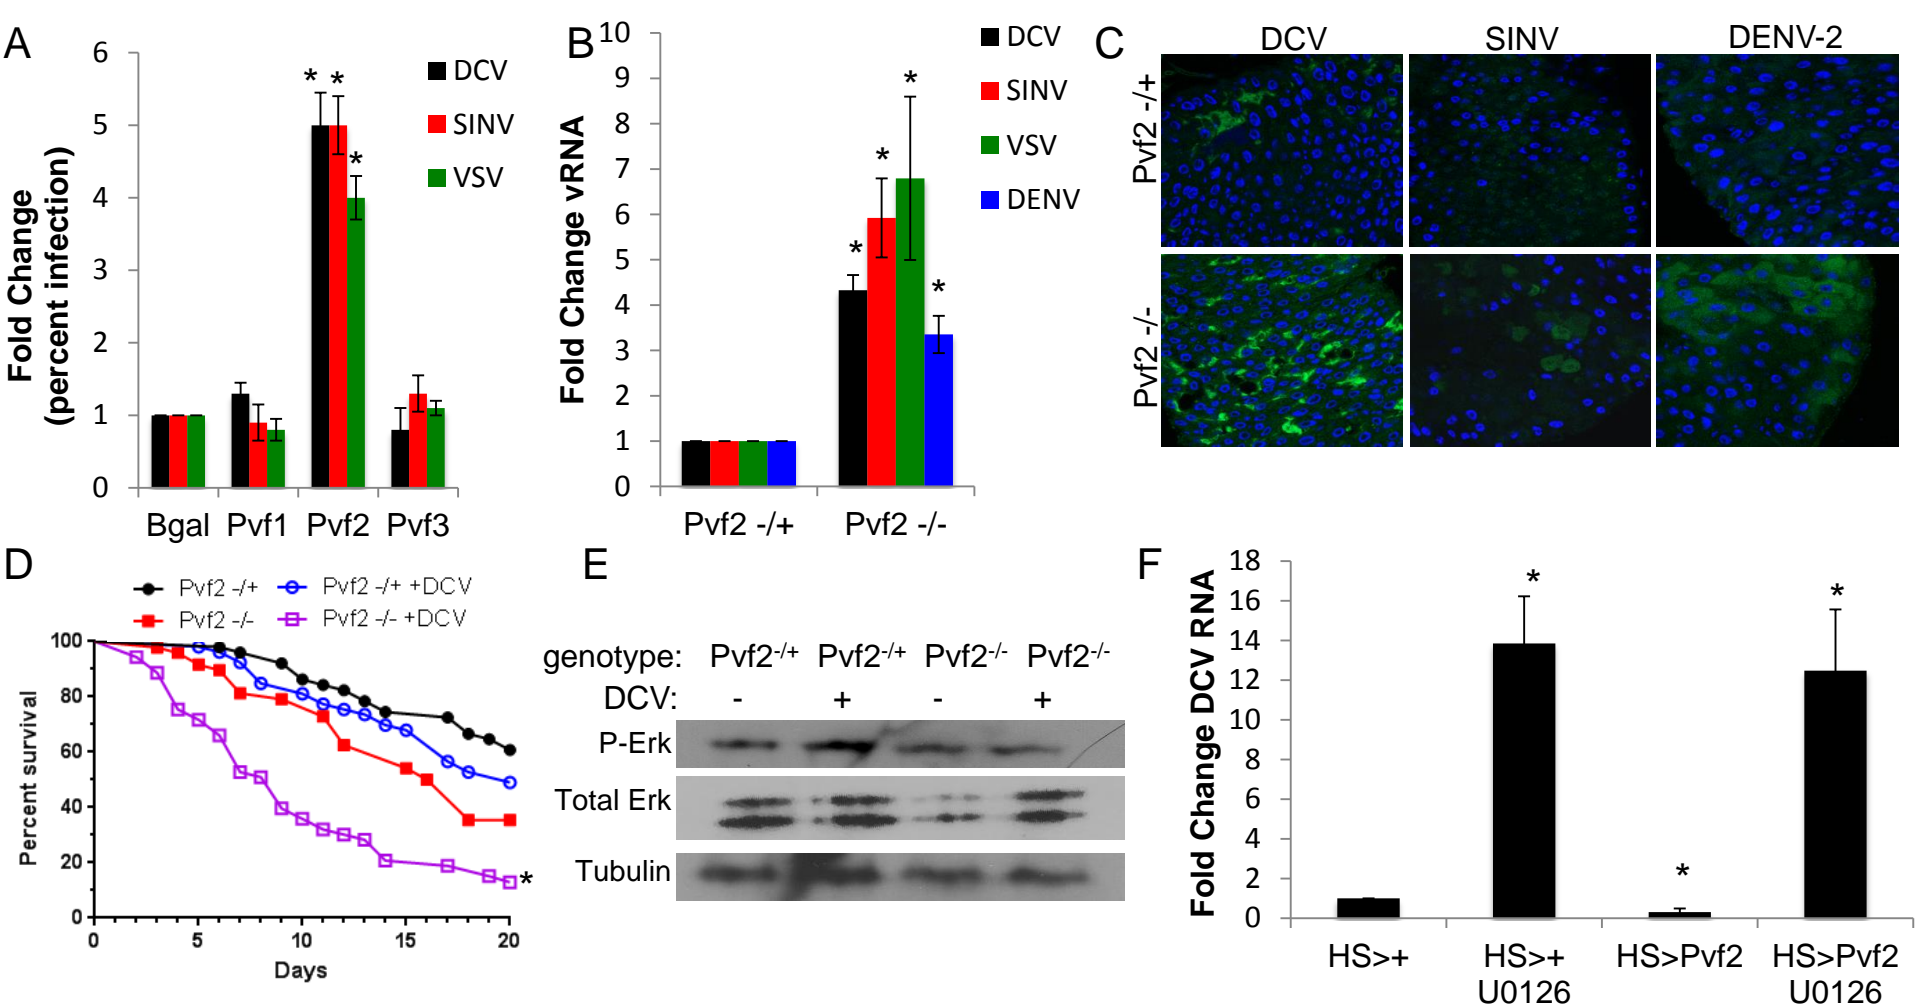

Supplement: NIHMS732228-supplement-3.pdf [file NIHMS732228-supplement-3.pdf]

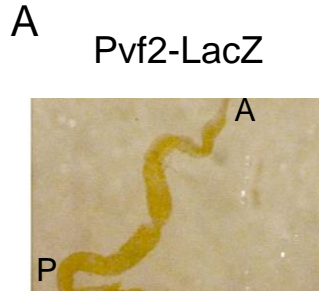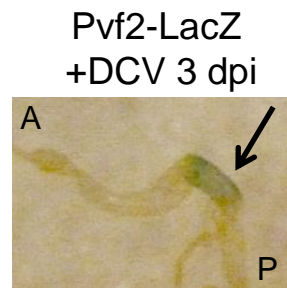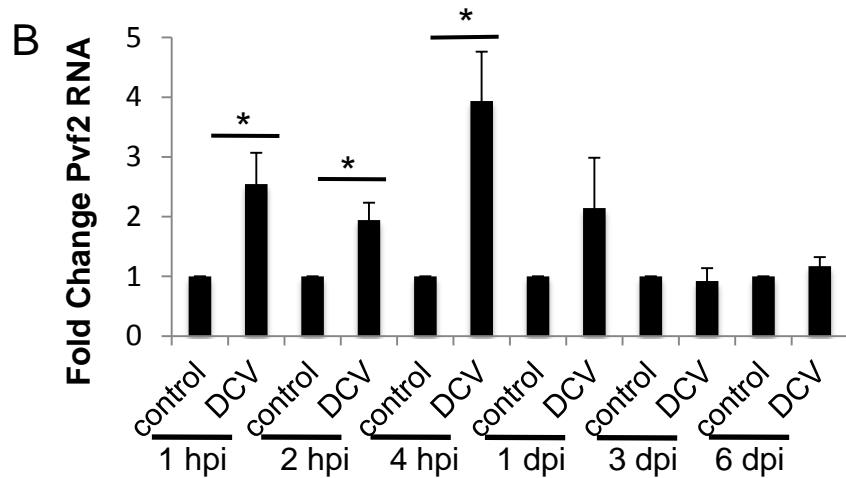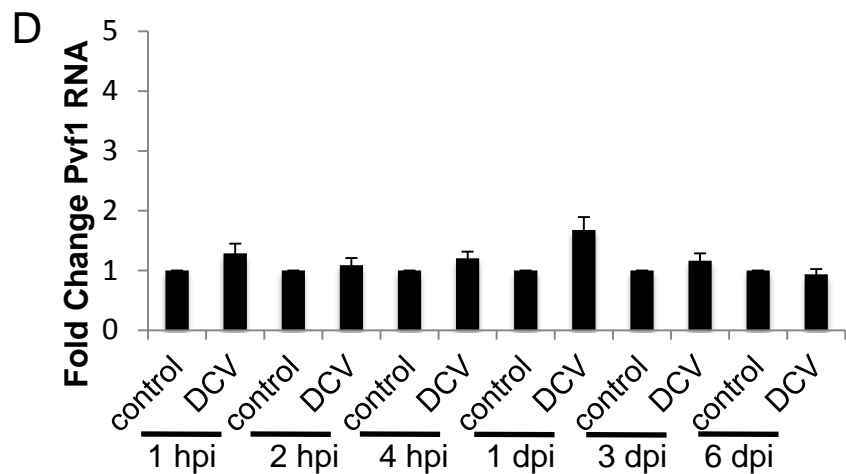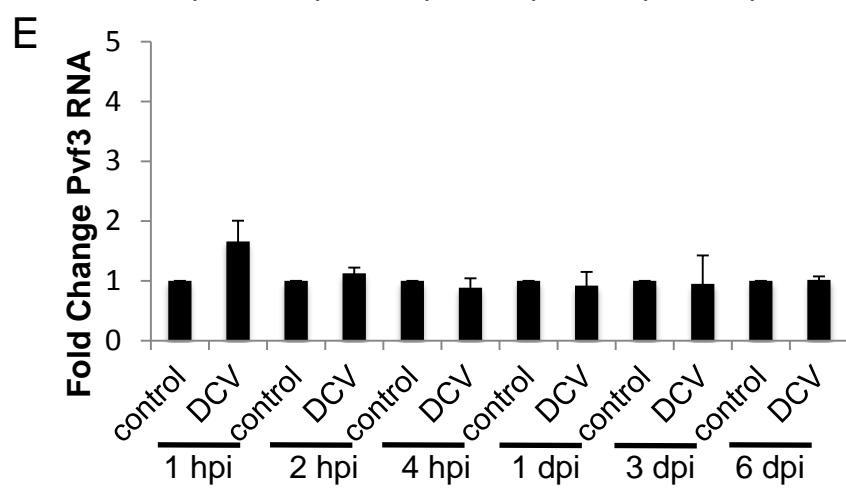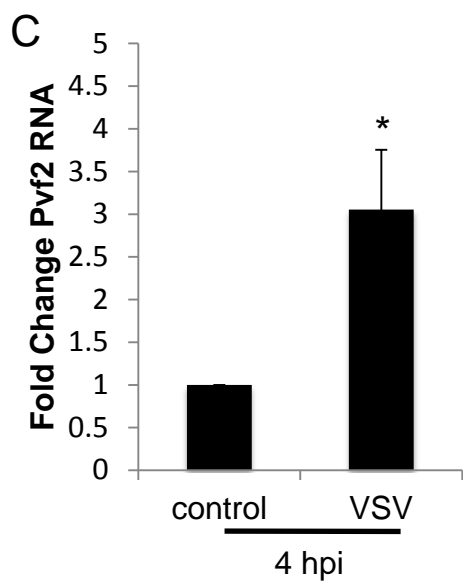

Supplement: NIHMS732228-supplement-4.pdf [file NIHMS732228-supplement-4.pdf]

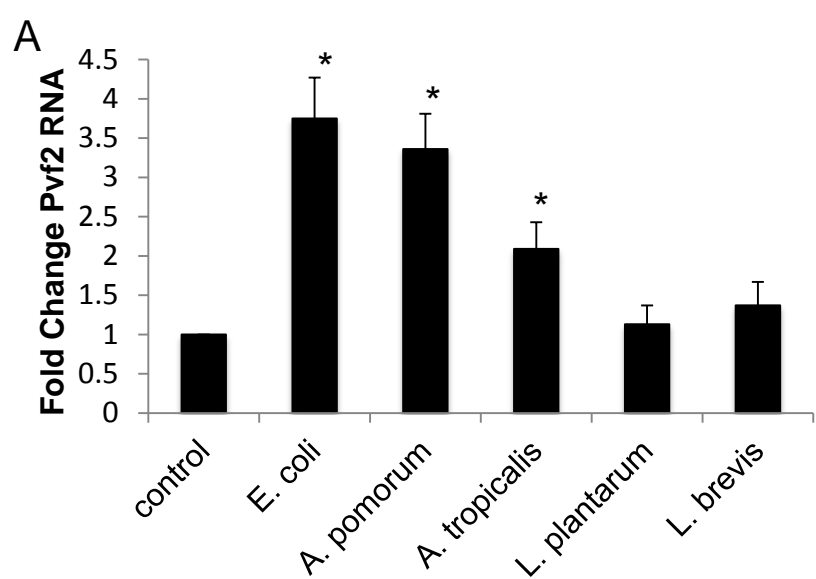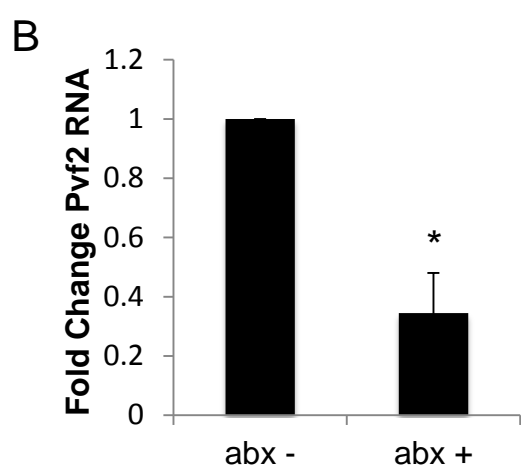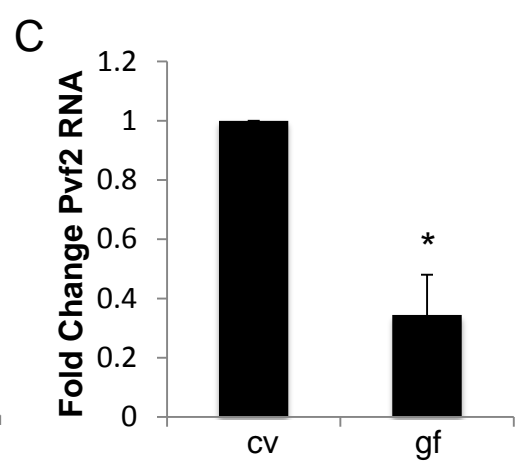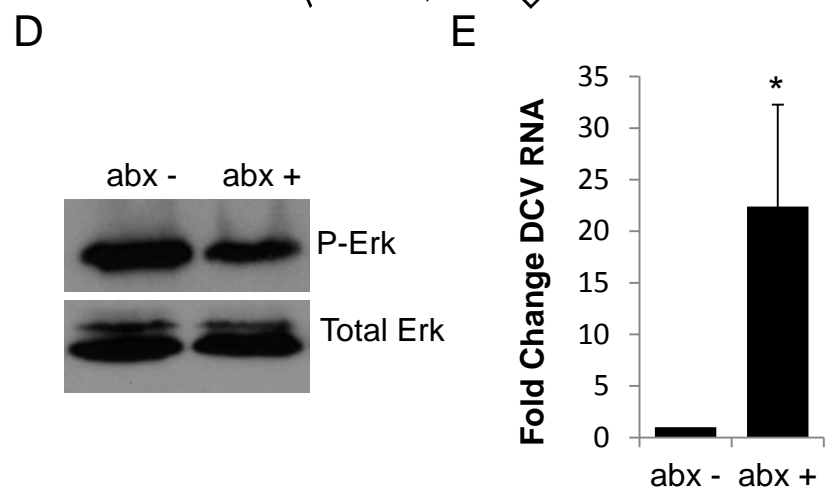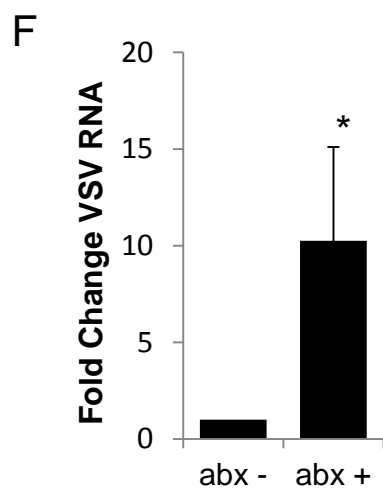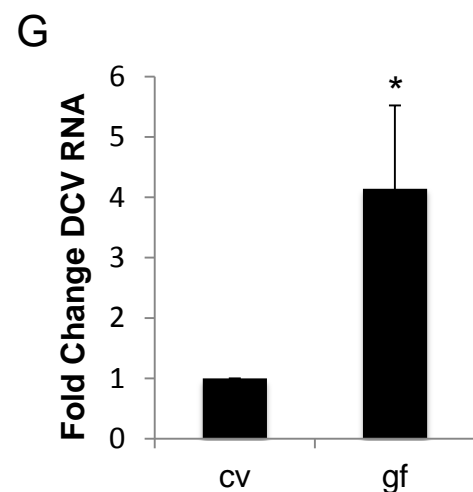

Supplement: NIHMS732228-supplement-5.pdf [file NIHMS732228-supplement-5.pdf]

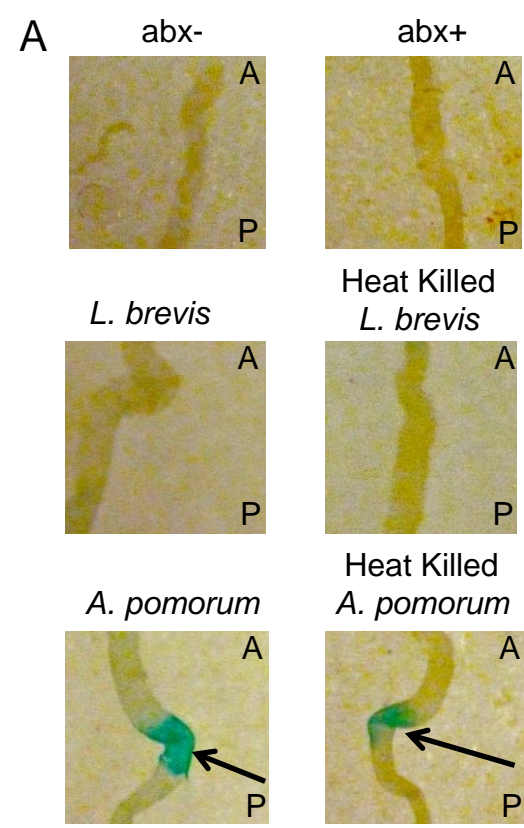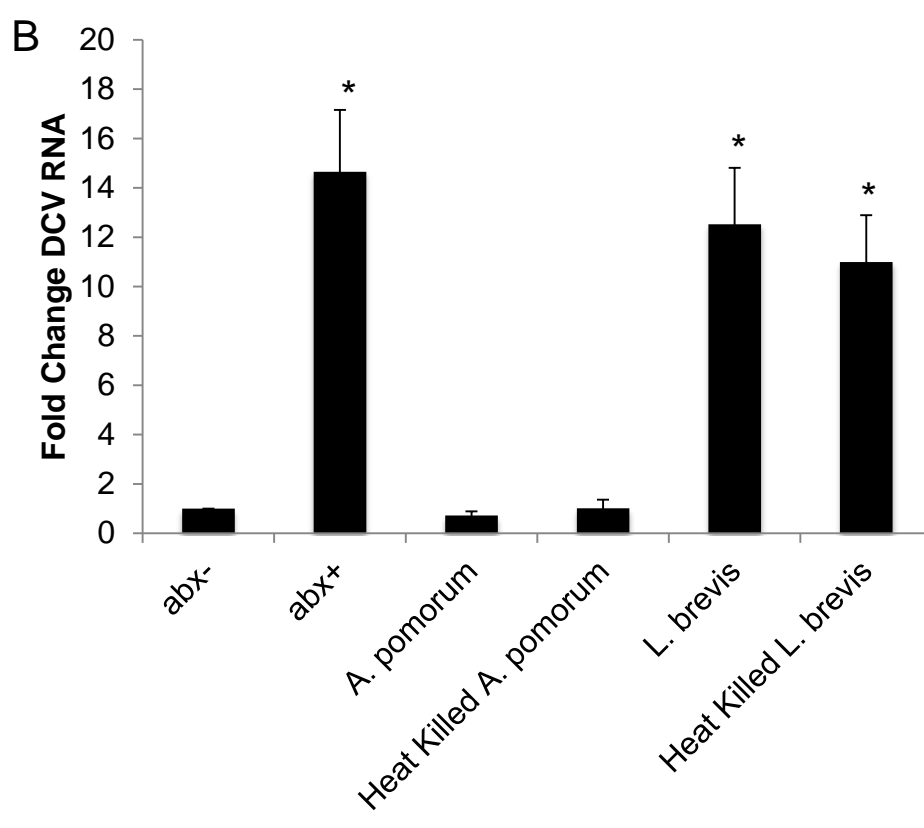

Supplement: NIHMS732228-supplement-6.pdf [file NIHMS732228-supplement-6.pdf]

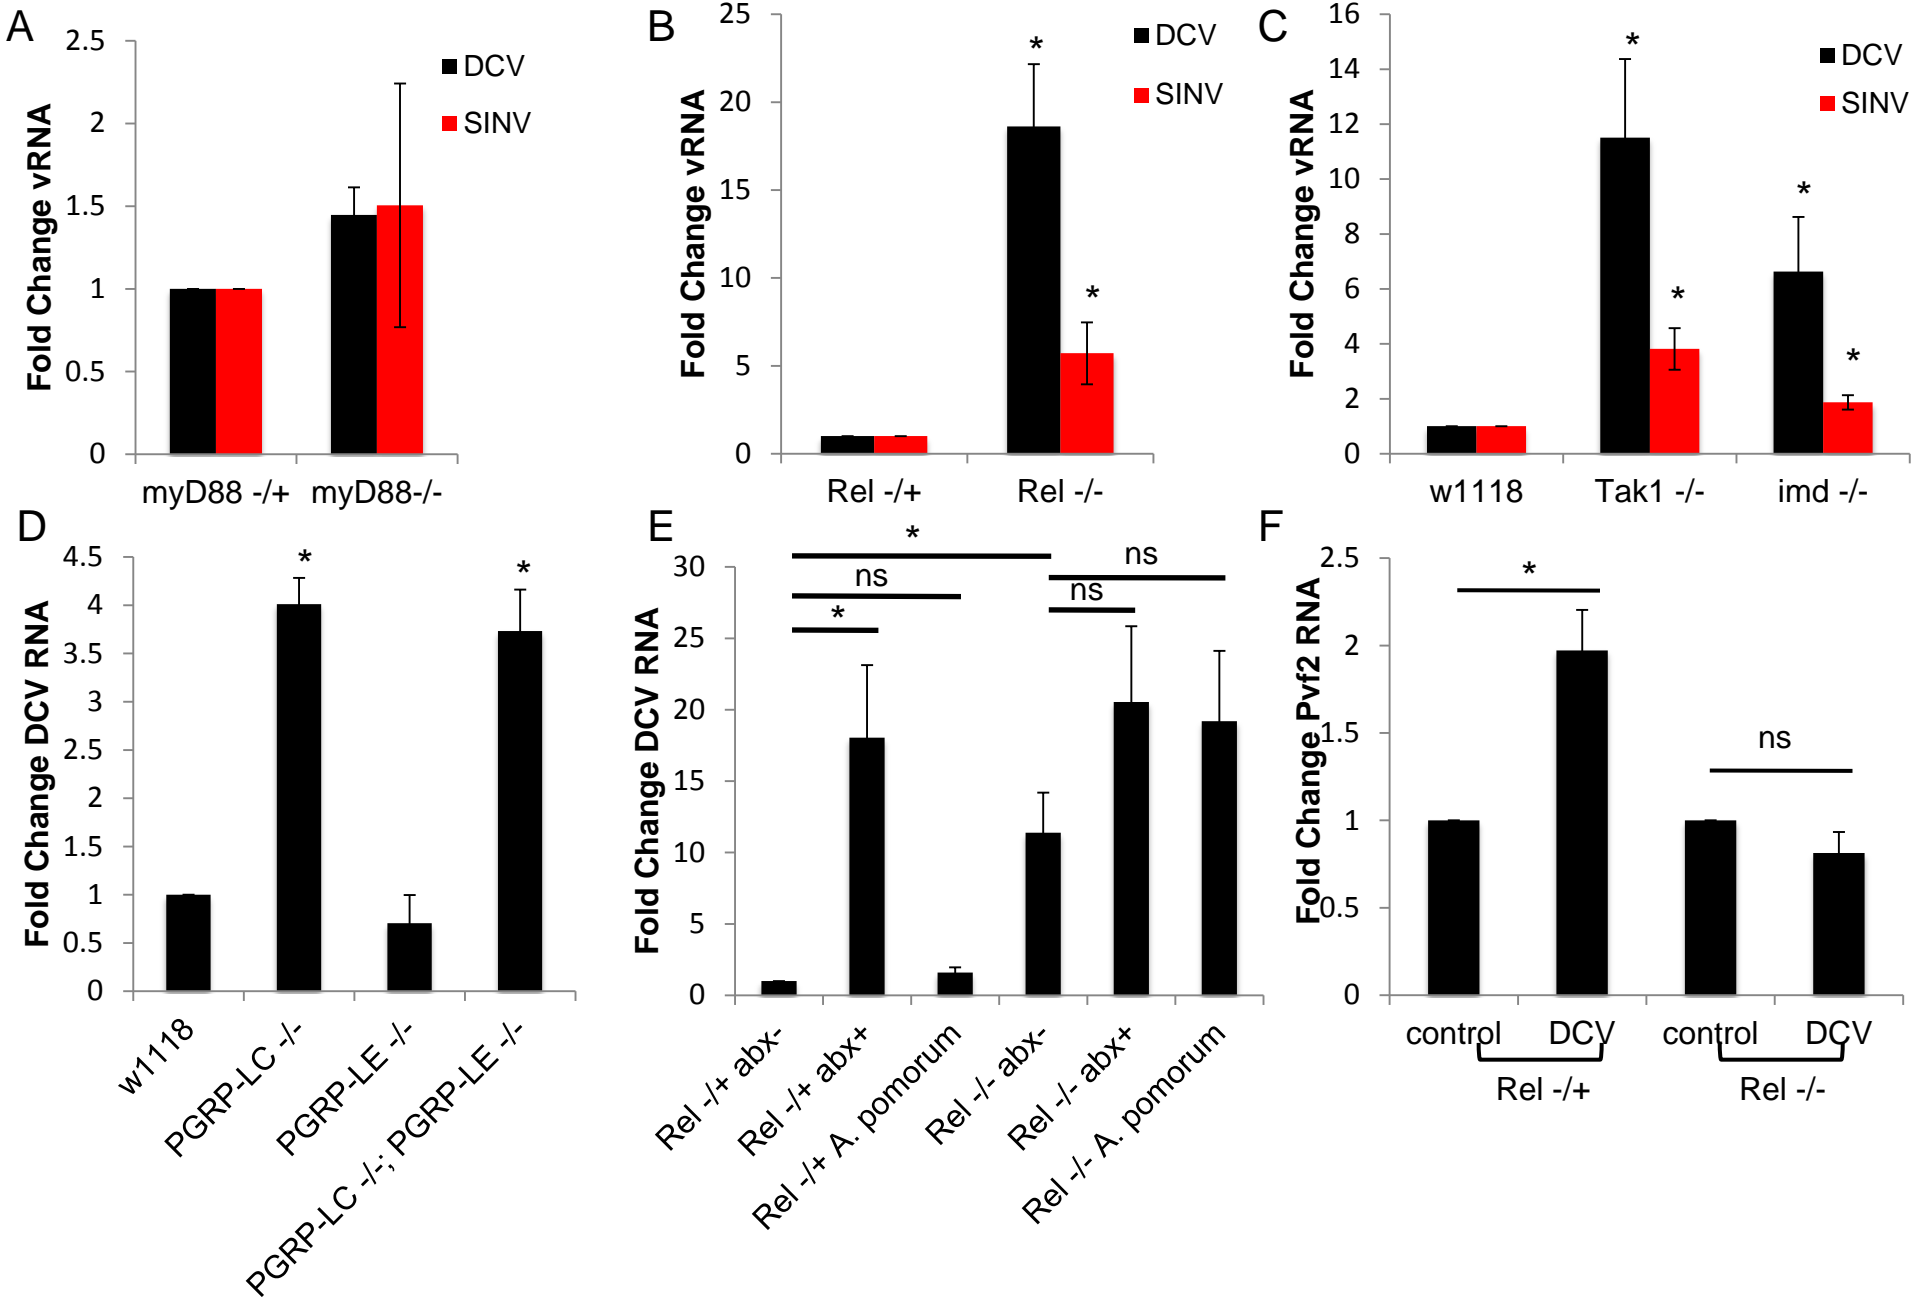

Supplement: NIHMS732228-supplement-7.pdf [file NIHMS732228-supplement-7.pdf]

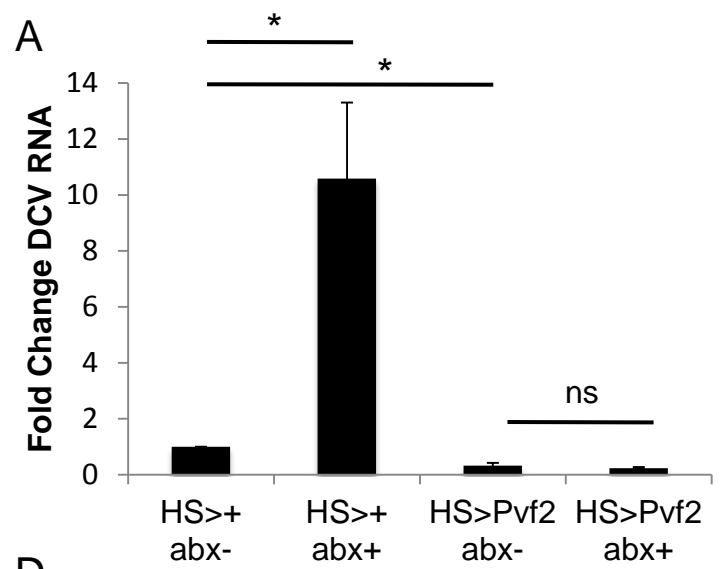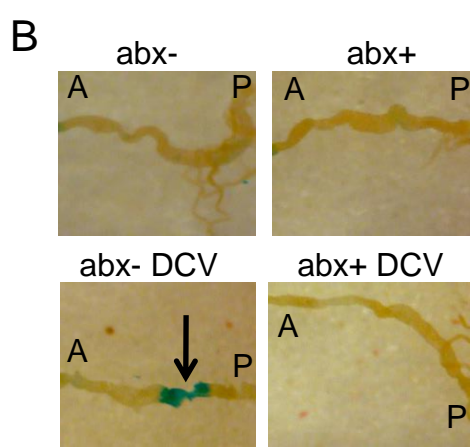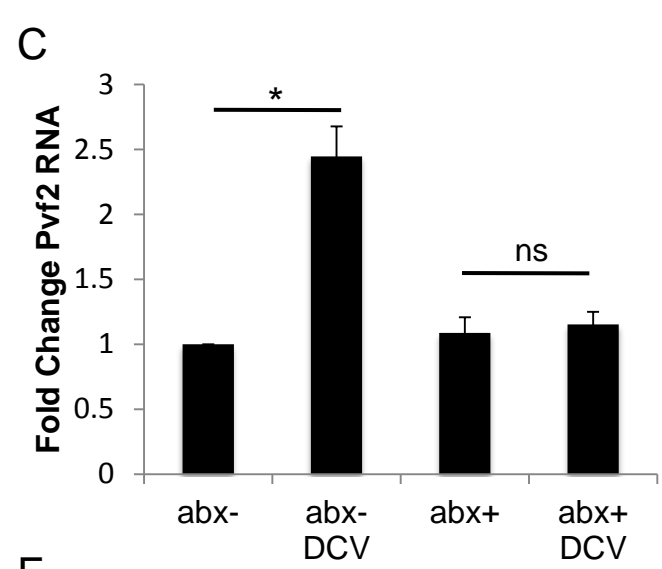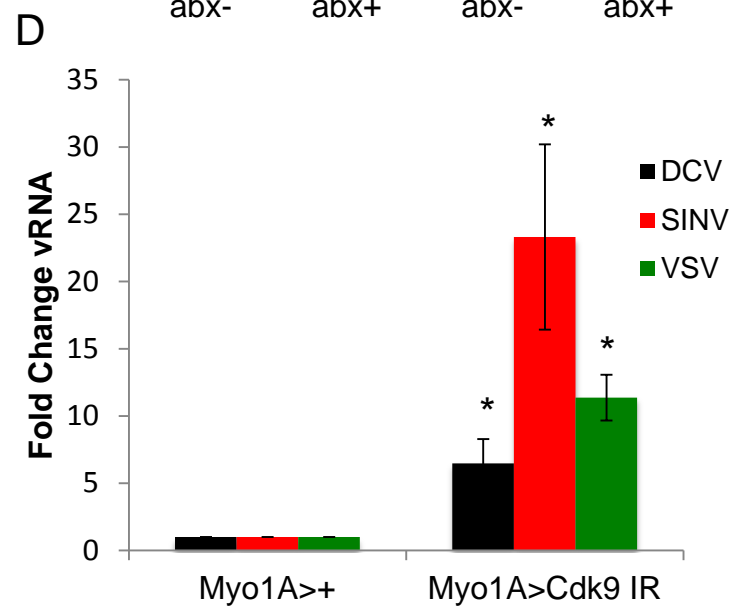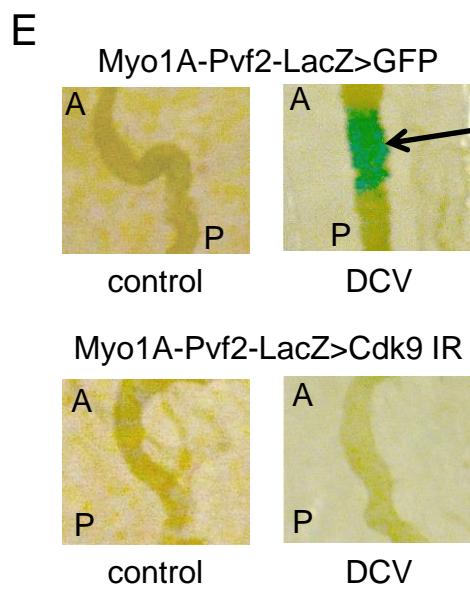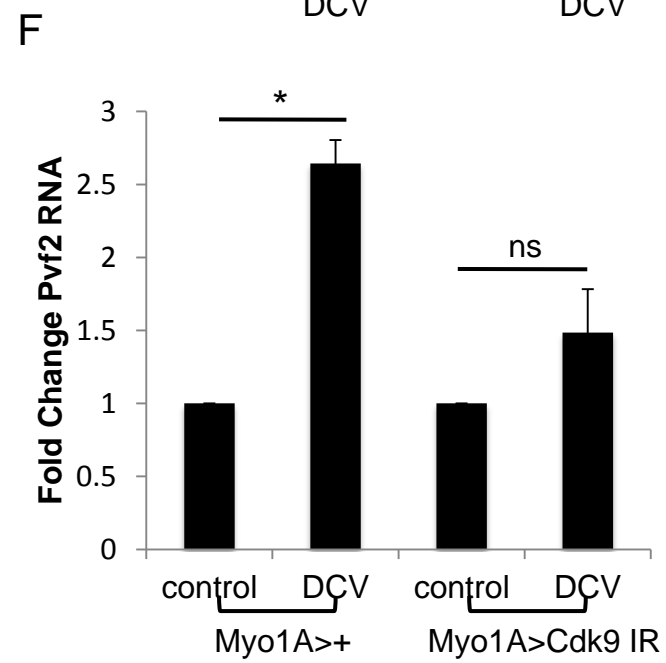

Supplement: NIHMS732228-supplement-8.pdf [file NIHMS732228-supplement-8.pdf]
